# Supplementary material
Source: PubMed Central journal article supplement (PMC8105009)
Supplement: AEM.02604-20-s0001.pdf [file AEM.02604-20-s0001.pdf]

**Table S1. Alterochromide A (alt) biosynthetic gene cluster annotation (scaffolds NZ\_NSDG01000052, NZ\_NSDG01000119 and NZ\_NSDG01000203)**

| Protein Name | Protein ID (GenBank) | Length (aa) | Conserved domains (CD-Search)                                                                    | Proposed function                | MiBiG Protein Homolog | MiBiG Homolog Description                         | % ID  | % Coverage | BLASTp Score | E-value   | MiBiG Homolog Cluster | MiBiG Cluster Product  | MiBiG Organism                     |
|--------------|----------------------|-------------|--------------------------------------------------------------------------------------------------|----------------------------------|-----------------------|---------------------------------------------------|-------|------------|--------------|-----------|-----------------------|------------------------|------------------------------------|
| AltA         | WP_095728151         | 539         | lyase class I like superfamily                                                                   | lyase (C-N or C-O bond cleavage) | ERG36772              | histidine ammonia-lyase                           | 99.0  | 99.8       | 1037.0       | 5.90E-303 | BGC0000299            | alterochromide A (NRP) | <i>Pseudoalteromonas piscicida</i> |
| AltB         | WP_095728150         | 97          | PP-binding superfamily (phosphopantetheine attachment site)                                      | T domain                         | ERG36773              | hypothetical protein                              | 92.0  | 100.0      | 121.0        | 1.00E-27  | BGC0000299            | alterochromide A (NRP) | <i>Pseudoalteromonas piscicida</i> |
| AltC         | WP_095728149         | 498         | PP-binding superfamily; 4 coum CoA lig superfamily (coumarate-CoA ligase)                        | loading T-A                      | ERG36774              | AMP-dependent synthetase and ligase               | 94.0  | 100.0      | 933.0        | 1.10E-271 | BGC0000299            | alterochromide A (NRP) | <i>Pseudoalteromonas piscicida</i> |
| AltD         | WP_095728148         | 727         | KAS I and II; condensing enzymes superfamily                                                     | KS                               | ERG36775              | 3-oxoacyl-ACP synthase                            | 97.0  | 100.0      | 1383.0       | 0         | BGC0000299            | alterochromide A (NRP) | <i>Pseudoalteromonas piscicida</i> |
| AltE         | WP_010369407         | 255         | CcmA superfamily (ABC-type multidrug transport system)                                           | transporter                      | ERG36776              | ABC transporter ATPase                            | 100.0 | 100.0      | 513.0        | 1.80E-145 | BGC0000299            | alterochromide A (NRP) | <i>Pseudoalteromonas piscicida</i> |
| AltF         | WP_010369409         | 371         | YadH superfamily (ABC-type multidrug transport system, permease component )                      | transporter                      | ERG36777              | ABC transporter permease                          | 100.0 | 100.0      | 703.0        | 1.40E-202 | BGC0000299            | alterochromide A (NRP) | <i>Pseudoalteromonas piscicida</i> |
| AltG         | WP_010369411         | 132         | hot dog superfamily                                                                              | DH                               | ERG36778              | 3-hydroxyacyl-ACP dehydratase                     | 100.0 | 100.0      | 273.0        | 1.60E-73  | BGC0000299            | alterochromide A (NRP) | <i>Pseudoalteromonas piscicida</i> |
| AltH         | WP_095728147         | 243         | NADB Rossmann superfamily (NAD(P)H/NAD(P)(+) binding (NADB) domain)                              | KR                               | ERG36779              | 3-oxoacyl-[acyl-carrier-protein] reductase (FabG) | 99.0  | 100.0      | 476.0        | 3.10E-134 | BGC0000299            | alterochromide A (NRP) | <i>Pseudoalteromonas piscicida</i> |
| AltI         | WP_095728146         | 235         | NA                                                                                               | unknown                          | ERG36780              | hypothetical protein                              | 95.0  | 100.0      | 435.0        | 4.40E-122 | BGC0000299            | alterochromide A (NRP) | <i>Pseudoalteromonas piscicida</i> |
| AltJ         | WP_095728145         | 251         | abhydrolase superfamily (alpha/beta hydrolase); GrsT (surfactin synthase thioesterase)           | TEII                             | ERG36781              | thioesterase                                      | 98.0  | 100.0      | 515.0        | 6.10E-146 | BGC0000299            | alterochromide A (NRP) | <i>Pseudoalteromonas piscicida</i> |
| AltK         | WP_095728144         | 1517        | PRK12467 (peptide synthase)                                                                      | C-A-T-E                          | ERG36782              | non-ribosomal peptide synthetase                  | 98.0  | 100.0      | 2895.0       | 2895      | BGC0000299            | alterochromide A (NRP) | <i>Pseudoalteromonas piscicida</i> |
| AltL         | WP_141240190         | 2615        | AFD (adenylate forming domain), Class I superfamily; PP (phosphopantetheine)-binding superfamily | C-A-T-E-C-A-T                    | WP_010369428          | non-ribosomal peptide synthetase                  | 97.0  | 100.0      | 822.0        | 3.10E-238 | BGC0000299            | alterochromide A (NRP) | <i>Pseudoalteromonas piscicida</i> |
| AltM         | WP_141240175         | 3280        | PPK12316 (peptide synthase)                                                                      | C-A-T-E-C-A-T-E-TE               | WP_010369430          | non-ribosomal peptide synthetase                  | 96.0  | 100.0      | 4916.0       | 0         | BGC0000299            | alterochromide A (NRP) | <i>Pseudoalteromonas piscicida</i> |
| AltN         | WP_095730079         | 412         | halo ClmS (chloramphenicol-biosynthetic FADH2-dependent halogenase)                              | halogenase                       | WP_010369433          | tryptophan halogenase                             | 96.0  | 100.0      | 805.0        | 4.90E-233 | BGC0000299            | alterochromide A (NRP) | <i>Pseudoalteromonas piscicida</i> |

Gene clusters were mined with antiSMASH 5.1 then individual encoded enzymes were compared to those in the Conserved Domain database (NCBI) and MiBiG repository. \*If a MiBiG homologue could not be detected, the closest BLASTp match from Genbank (NCBI) was recorded instead.

**Table S2. Pseudoalterobactin biosynthetic (*pab*) gene cluster annotation (scaffold NZ\_NSDG01000065)**

| Protein Name | Protein ID (GenBank) | Length (aa) | Conserved domains (CD-Search)                                                 | Proposed function      | MIBiG Protein Homolog | MIBiG Homolog Description                                   | % ID  | % Coverage | BLASTp Score | E-value   | MIBiG Homolog Cluster | MIBiG Cluster Product          | MIBiG Organism                     |
|--------------|----------------------|-------------|-------------------------------------------------------------------------------|------------------------|-----------------------|-------------------------------------------------------------|-------|------------|--------------|-----------|-----------------------|--------------------------------|------------------------------------|
| PabS         | WP_095728646         | 515         | PRK00915 (isopropylmalate synthase) superfamily                               | substrate biosynthesis | AHZ61876              | pyruvate carboxyltransferase/2-isopropylmalate synthase     | 38.0  | 66.2       | 213.0        | 1.00E-54  | BGC0000240            | lomaiviticin A (PK/Saccharide) | <i>Salinispora pacifica</i>        |
| PabT         | NA                   | 358         | Iso dh (isocitrate/isopropylmalate dehydrogenase) superfamily                 | substrate biosynthesis | WP_010374375*         | 3-isopropylmalate dehydrogenase                             | 100.0 | 83.0       | 91.7         | 3e-20     | NA                    | NA                             | <i>Pseudoalteromonas piscicida</i> |
| PabU         | WP_095728645         | 467         | aconitase superfamily (citrate/isocitrate isomerase)                          | substrate biosynthesis | ARO49575              | 3-isopropylmalate dehydratase large subunit                 | 59.0  | 98.1       | 523.0        | 3.20E-148 | BGC0001441            | belactosin A                   | <i>Streptomyces</i> sp.            |
| PabV         | WP_095728644         | 199         | aconitase swivel superfamily                                                  | substrate biosynthesis | AHZ61874              | isopropylmalate dehydratase small subunit                   | 37.0  | 97.5       | 133.0        | 4.00E-31  | BGC0000240            | lomaiviticin A (PK/Saccharide) | <i>Salinispora pacifica</i>        |
| PabA         | WP_095728639         | 67          | MbtH superfamily                                                              | unknown                | CAQ71824              | MbtH-like protein                                           | 64.0  | 94.0       | 102.0        | 2.50E-22  | BGC0001189            | taiwachelin (NRP)              | <i>Cupriavidus taiwanensis</i>     |
| PabB         | WP_095728638         | 1741        | PRK05691                                                                      | AL-T-C-A-T             | WP_039806856          | non-ribosomal peptide synthetase                            | 38.0  | 102.0      | 1102.0       | 0         | BGC0002001            | crochelin A (NRP/PK)           | <i>Azotobacter chroococcum</i>     |
| PabC         | WP_095728637         | 1463        | cond enzymes superfamily; NADB Rossmann superfamily                           | KS-AT-KR-T             | WP_039806854          | type I polyketide synthase                                  | 41.0  | 103.0      | 977.0        | 2.00E-284 | BGC0002001            | crochelin A (NRP/PK)           | <i>Azotobacter chroococcum</i>     |
| PabD         | WP_095728636         | 806         | Ntn hydrolase superfamily (hydrolysis of amide bonds)                         | regulation             | WP_081480190          | acylase                                                     | 36.0  | 100.4      | 517.0        | 4.00E-146 | BGC0001716            | odilorhabdins (NRP)            | <i>Xenorhabdus nematophila</i>     |
| PabE         | WP_095728635         | 721         | OM channels superfamily (porin)                                               | transport              | PHM29813              | ferric alcaligin siderophore receptor                       | 27.0  | 106.4      | 260.0        | 6.00E-69  | BGC0001870            | putrebactin (other)            | <i>Xenorhabdus budapestensis</i>   |
| PabF         | WP_095728634         | 1538        | PRK12467                                                                      | C-A-T-C                | AEH59100              | nonribosomal peptide synthetase                             | 33.0  | 99.0       | 690.0        | 6.50E-198 | BGC0000385            | lysobactin (NRP)               | <i>Lysobacter</i> sp.              |
| PabG         | WP_095728633         | 3026        | PRK12316                                                                      | C-A-T-E-C-A-T-C        | BAH43871              | gramicidin non-ribosomal peptide synthetase LgrC            | 32.0  | 99.2       | 1446.0       | 0         | BGC0000367            | gramicidin (NRP)               | <i>Brevibacillus brevis</i>        |
| PabH         | WP_095728632         | 353         | CAS like superfamily                                                          | hydroxylation          | CAQ71826              | non-ribosomal peptide synthetase/dioxygenase/oxidoreductase | 64.0  | 89.8       | 453.0        | 2.40E-127 | BGC0001189            | taiwachelin (NRP)              | <i>Cupriavidus taiwanensis</i>     |
| PabI         | WP_095728631         | 1036        | PPK12467; A NRPS; AFD class I superfamily                                     | C-A-T                  | CAQ71827              | non-ribosomal peptide synthetase                            | 34.0  | 103.8      | 472.0        | 1.40E-132 | BGC0001189            | taiwachelin (NRP)              | <i>Cupriavidus taiwanensis</i>     |
| PabJ         | WP_095728630         | 1334        | PRK12467; abhydrolase superfamily                                             | C-A-T-TE               | WP_144411596          | non-ribosomal peptide synthetase                            | 33.0  | 88.4       | 537.0        | 8.00E-152 | BGC0002001            | crochelin A (NRP/PK)           | <i>Azotobacter chroococcum</i>     |
| PabK         | WP_095728629         | 693         | ligand gated channel; OM channels superfamily (porin)                         | receptor               | ADJ63844              | TonB-dependent siderophore receptor                         | 26.0  | 103.9      | 199.0        | 1.60E-50  | BGC0000424            | serobactin C (NRP/siderophore) | <i>Herbaspirillum seropedicae</i>  |
| PabL         | WP_095728628         | 447         | PepSY TM                                                                      | receptor               | AA93425               | PepSY-associated TM helix domain protein                    | 30.0  | 81.2       | 166.0        | 7.30E-41  | BGC0000413            | pyoverdin (NRP)                | <i>Pseudomonas protegens</i>       |
| PabM         | WP_095728627         | 254         | PRK08220 superfamily (2,3-dihydroxybenzoate-2,3-dehydrogenase)                | DHB biosynthesis       | YP_856989             | 2,3-dihydro-2,3-dihydroxybenzoate dehydrogenase             | 52.0  | 96.5       | 239.0        | 6.60E-63  | BGC0001502            | amonabactin P 750 (NRP)        | <i>Aeromonas hydrophila</i>        |
| PabN         | WP_095728626         | 435         | C NRPS-like superfamily                                                       | C-domain               | YP_856990             | nonribosomal peptide synthetase                             | 29.0  | 96.1       | 173.0        | 5.80E-43  | BGC0001502            | amonabactin P 750 (NRP)        | <i>Aeromonas hydrophila</i>        |
| PabO         | WP_095728625         | 288         | cysteine hydrolase superfamily; PP-binding superfamily (e.g. isochorismatase) | DHB biosynthesis       | ACR10711              | isochorismatase                                             | 50.0  | 101.0      | 292.0        | 5.70E-79  | BGC0000451            | turnerbactin (NRP)             | <i>Teredinibacter turnerae</i>     |
| PabP         | WP_095728624         | 538         | EntE                                                                          | A-domain               | YP_856992             | 2,3-dihydroxybenzoate-AMP ligase                            | 56.0  | 98.9       | 579.0        | 7.40E-165 | BGC0001502            | amonabactin P 750 (NRP)        | <i>Aeromonas hydrophila</i>        |

|      |              |     |                                                             |                  |                   |                                |      |       |       |          |            |                       |                                    |
|------|--------------|-----|-------------------------------------------------------------|------------------|-------------------|--------------------------------|------|-------|-------|----------|------------|-----------------------|------------------------------------|
| PabQ | WP_095728623 | 404 | MenF (Isochorismate synthase)                               | DHB biosynthesis | ACR13729          | isochorismate synthase<br>DhbC | 41.0 | 92.3  | 264.0 | 3.00E-70 | BGC0000451 | turnerbactin<br>(NRP) | <i>Teredinibacter<br/>turnerae</i> |
| PabR | WP_095728622 | 246 | Fe III red FhuF superfamily<br>(siderophore-iron reductase) | regulation       | WP_09903132<br>5* | (2Fe-2S)-binding protein       | 93.1 | 100.0 | 486.0 | 5e-173   | NA         | NA                    | <i>Pseudoalteromonas<br/>sp.</i>   |

Gene clusters were mined with antiSMASH 5.1 then individual encoded enzymes were compared to those in the Conserved Domain database (NCBI) and MIBiG repository. \*If a MIBiG homologue could not be detected, the closest BLASTp match from Genbank (NCBI) was recorded instead.

**Table S3. Alteramide biosynthetic (*alm*) gene cluster annotation (scaffold NZ\_NSDG01000081)**

| Protein Name | Protein ID (GenBank) | Length (aa) | Conserved domains (CD-Search)                                             | Proposed function      | MiBiG Protein Homolog | MiBiG Homolog Description              | % ID | % Coverage | BLASTp Score | E-value   | MiBiG Homolog Cluster | MiBiG Cluster Product         | MiBiG Organism                |
|--------------|----------------------|-------------|---------------------------------------------------------------------------|------------------------|-----------------------|----------------------------------------|------|------------|--------------|-----------|-----------------------|-------------------------------|-------------------------------|
| AlmA         | WP_095728960         | 434         | zinc peptidase like superfamily                                           | peptidase              | WP_102056891*         | succinyl-diaminopimelate desuccinylase | 93.3 | 100.0      | 852.0        | 0         | NA                    | NA                            | <i>Pseudoalteromonas</i> sp.  |
| AlmB         | WP_095728959         | 3113        | cond enzymes superfamily; NADB Rossmann superfamily; PP-binding; PRK12467 | KS-AT-DH-KR-T-C-A-T-TE | ABL86391              | hybrid NRPS/PKS                        | 44.0 | 101.2      | 2505.0       | 0         | BGC0000999            | heat-stable antifungal factor | <i>Lysobacter enzymogenes</i> |
| AlmC         | WP_095728958         | 551         | COG1233 superfamily (phytoene dehydrogenase-related protein)              | dehydrogenase          | BAG17641              | FAD-dependent oxidoreductase           | 54.0 | 96.4       | 596.0        | 3.50E-170 | BGC0001043            | SGR PTMs (NRP/PK)             | <i>Streptomyces griseus</i>   |
| AlmD         | WP_095728957         | 178         | FMN red superfamily                                                       | reductase              | WP_099029208*         | flavodoxin FldB                        | 98.3 | 100.0      | 356.0        | 6e-124    | NA                    | NA                            | <i>Pseudoalteromonas</i> sp.  |
| AlmE         | WP_095728956         | 554         | COG1233 superfamily (phytoene dehydrogenase-related protein)              | dehydrogenase          | AWO77089              | FAD-dependent oxidoreductase           | 43.0 | 95.7       | 415.0        | 2.40E-126 | BGC0001556            | combamide (NRP/PK)            | <i>Streptomyces</i> sp.       |
| AlmF         | WP_095728955         | 321         | FA hydroxylase superfamily                                                | hydroxylase            | ABL86392              | sterol desaturase-like protein         | 43.0 | 85.0       | 242.0        | 7.50E-64  | BGC0000999            | heat-stable antifungal factor | <i>Lysobacter enzymogenes</i> |
| AlmG         | WP_095728954         | 459         | MATE like superfamily                                                     | transport              | CAN93353              | MATE efflux family protein             | 43.0 | 96.9       | 356.0        | 6.70E-98  | BGC0000179            | etnangien (PK)                | <i>Sorangium cellulosum</i>   |

Gene clusters were mined with antiSMASH 5.1 then individual encoded enzymes were compared to those in the Conserved Domain database (NCBI) and MiBiG repository. \*If a MiBiG homologue could not be detected, the closest BLASTp match from Genbank (NCBI) was recorded instead.

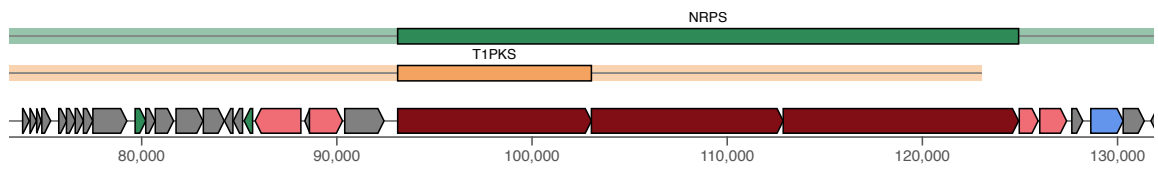

a) Hybrid NRPS-PKS 1

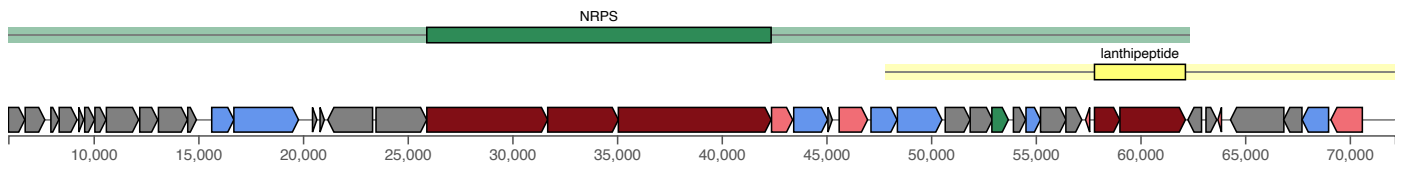

b) Hybrid Lanthipeptide-NRPS

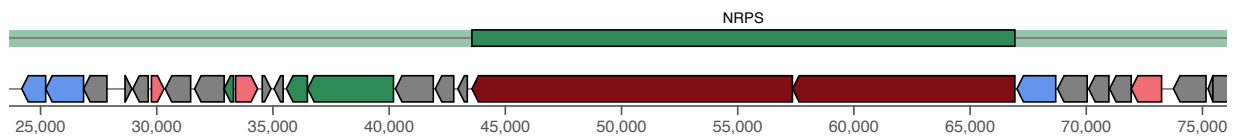

c) NRPS

**Figure S1. Orphan gene clusters identified in *Pseudoalteromonas* HM-SA03 genome by antiSMASH 5.1.2.** Core biosynthetic genes (crimson), additional biosynthetic genes (salmon), transport-related genes (blue), regulatory genes (green), other genes (grey).

**Table S4. Novel NRPS-TIPKS (siderophore) biosynthetic (sid) gene cluster annotation (scaffold NZ\_NSDG01000022)**

| Protein Name | Protein ID (GenBank) | Length (aa) | Conserved domains (CD-Search)                                        | Proposed function      | MIBiG Protein Homolog | MIBiG Homolog Description                    | % ID  | % Coverage | BLASTp Score | E-value   | MIBiG Homolog Cluster | MIBiG Cluster Product     | MIBiG Organism                         |
|--------------|----------------------|-------------|----------------------------------------------------------------------|------------------------|-----------------------|----------------------------------------------|-------|------------|--------------|-----------|-----------------------|---------------------------|----------------------------------------|
| SidA         | WP_095727185         | 732         | PRK10044 (ferrichrome outer membrane transporter)                    | regulation             | CAQ71830              | TonB-dependent siderophore receptor          | 36.0  | 101.1      | 421.0        | 2.10E-117 | BGC0001189            | taiwachelin (NRP)         | <i>Cupriavidus taiwanensis</i>         |
| SidB         | None                 | 85          | K oxygenase                                                          | oxidoreductase         | ADJ63845              | L-ornithine N5-monoxygenase protein          | 51.0  | 97.7       | 97.0         | 1.40E-20  | BGC0000424            | serobactin C (NRP)        | <i>Herbaspirillum seropedicae</i>      |
| SidC         | WP_095727186         | 138         | ExbD superfamily (membrane bound transport proteins)                 | transport              | WP_102056205*         | biopolymer transporter ExbD                  | 97.8  | 100.0      | 266.0        | 7.00E-90  | NA                    | NA                        | <i>Pseudoalteromonas</i> sp.           |
| SidD         | WP_095727187         | 240         | TolQ; MotA ExB superfamily (proton channel)                          | transport              | WP_138580328*         | MotA/TolQ/ExbB proton channel family protein | 98.0  | 100.0      | 482.0        | 8.00E-172 | NA                    | NA                        | <i>Pseudoalteromonas</i> sp.           |
| SidE         | WP_051009522         | 89          | TonB C superfamily (receptor)                                        | transport              | WP_174170301*         | energy transducer TonB                       | 100.0 | 100.0      | 196.0        | 1.00E-61  | NA                    | NA                        | <i>Pseudoalteromonas</i> sp.           |
| SidF         | WP_176474608         | 103         | NA                                                                   | unknown                | PAA74211*             | hypothetical protein                         | 73.3  | 83.0       | 437.0        | 6.00E-18  | NA                    | NA                        | <i>Macrostromum lignano</i>            |
| SidG         | WP_141240122         | 538         | OM channels superfamily (porin)                                      | regulation             | WP_085297362*         | TonB-dependent receptor                      | 65.9  | 98.0       | 722.0        | 0         | NA                    | NA                        | <i>Colwellia mytili</i>                |
| SidH         | WP_095727191         | 237         | TrpE superfamily (anthranilate/para-aminobenzoate synthases)         | isochorismate synthase | WP_063364360*         | chorismate-binding protein                   | 79.5  | 70.0       | 286.0        | 2.00E-92  | NA                    | NA                        | <i>Pseudoalteromonas luteoviolacea</i> |
| SidI         | WP_095727192         | 1739        | PPK12467; A NRPS TImIV like; ADF class I superfamily                 | A-T-Cy-A-T             | AEE88284              | NRPS/PKS (CurF)                              | 45.0  | 71.4       | 1050.0       | 2.80E-306 | BGC0000976            | curacin A (NRP/PK)        | <i>Moorea producens</i>                |
| SidJ         | WP_095727193         | 1808        | PksD; cond enzymes superfamily;NADB Rossmann superfamily; PP-binding | KS-AT-DH-KR-T          | AAF19812              | NRPS/PKS (MtaD)                              | 42.0  | 99.2       | 1309.0       | 0         | BGC0001024            | myxothiazol (NRP/PK)      | <i>Stigmatella aurantiaca</i>          |
| SidK         | WP_095727194         | 1201        | TubC N; PPK12467                                                     | C-A-T                  | AXN93614              | NRPS (PuwF)                                  | 43.0  | 96.3       | 894.0        | 1.40E-259 | BGC0001953            | puwainaphycin F (NRP)     | <i>Anabaena</i> sp.                    |
| SidL         | WP_095727195         | 1877        | PksD; cond enzymes superfamily; PKS MT; KR 2 FAS SDR x; PP-binding   | KS-AT-oMT-KR-T         | DAB41916              | PKS (ArzN)                                   | 44.0  | 100.5      | 1467.0       | 0         | BGC0001884            | aranazole A (NRP/PK)      | <i>Fischerella</i> sp.                 |
| SidM         | WP_176474609         | 1398        | Cyc NRPS; AFD class-I superfamily; Nitro FMN reductase; PRK12467     | Cy-A-Ox-T              | DAB41917              | NRPS (ArzO)                                  | 45.0  | 98.4       | 1193.0       | 0         | BGC0001884            | aranazole A (NRP/PK)      | <i>Fischerella</i> sp.                 |
| SidN         | WP_095727197         | 2028        | cond enzymes superfamily; NADB Rossmann; PKS ER                      | KS-AT-DH-ER-KR         | AEU11005              | NRPS/PKS (NpnA)                              | 46.0  | 103.0      | 1744.0       | 0         | BGC0001029            | nostophycin (NRP/PK)      | <i>Nostoc</i> sp.                      |
| SidO         | WP_095727198         | 93          | PP-binding superfamily                                               | T                      | ABM21570              | PKS (CrpB)                                   | 41.0  | 73.1       | 62.0         | 4.00E-10  | BGC0000975            | cryptophycin-327 (NRP/PK) | <i>Nostoc</i> sp.                      |
| SidP         | WP_095727199         | 1423        | TubC; PPK12467; abhydrolase superfamily                              | C-A-T                  | AXN93602              | NRPS (PuwF-G)                                | 43.0  | 81.0       | 871.0        | 1.90E-252 | BGC0001952            | minutissamide A (NRP)     | <i>Anabaena minutissima</i>            |
| SidQ         | WP_095727200         | 255         | abhydrolase superfamily                                              | TE                     | CAD29792              | thioesterase (McyT)                          | 45.0  | 92.9       | 216.0        | 4.60E-56  | BGC0001015            | microcystin (NRP/PK)      | <i>Planktothrix agardhii</i>           |
| SidR         | WP_095727201         | 105         | CM 2 superfamily (chorismate mutase type II)                         | salicylate synthase    | AAO07762              | Isochorismate pyruvate-lyase                 | 56.0  | 101.0      | 134.0        | 7.20E-32  | BGC0000460            | vulnibactin (NRP)         | <i>Vibrio vulnificus</i>               |

Gene clusters were mined with antiSMASH 5.1 then individual encoded enzymes were compared to those in the Conserved Domain database (NCBI) and MIBiG repository. \*If a MIBiG homologue could not be detected, the closest BLASTp match from Genbank (NCBI) was recorded instead.

Table S5. Novel NRPS biosynthetic gene cluster (scaffold NZ\_NSDG01000113)

| Protein Name | Protein ID (GenBank) | Length (aa) | Conserved domains (CD-Search)                                      | Proposed function                                                              | MiBiG Protein Homolog | MiBiG Homolog Description                   | % ID | % Coverage | BLASTp Score | E-value   | MiBiG Homolog Cluster | MiBiG Cluster Product    | MiBiG Organism                                                  |
|--------------|----------------------|-------------|--------------------------------------------------------------------|--------------------------------------------------------------------------------|-----------------------|---------------------------------------------|------|------------|--------------|-----------|-----------------------|--------------------------|-----------------------------------------------------------------|
| WP_095729892 |                      | 434         | AAT I superfamily                                                  | transamination, racemization, decarboxylation, or various side-chain reactions | WP_013184465          | diaminobutyrate-2-oxoglutarate transaminase | 56.0 | 95.9       | 496.0        | 5.10E-140 | BGC0001716            | odilorhabdins (NRP)      | <i>Xenorhabdus nematophila</i>                                  |
| WP_095729891 |                      | 310         | cupin like superfamily                                             | unknown                                                                        | WP_021711495*         | cupin-like domain-containing protein        | 71.0 | 84.0       | 486.0        | 6.00E-164 | NA                    | NA                       | <i>Vibrio azureus</i>                                           |
| WP_095729890 |                      | 290         | cupin like superfamily                                             | unknown                                                                        | WP_010846017          | hypothetical protein                        | 45.0 | 99.0       | 262.0        | 8.30E-70  | BGC0001716            | odilorhabdins (NRP)      | <i>Xenorhabdus nematophila</i>                                  |
| WP_176474729 |                      | 424         | metL (aspartate kinase II/homoserine dehydrogenase II)             | kinase/dehydrogenase                                                           | EWM63050              | aspartate kinase 2                          | 30.0 | 45.0       | 79.0         | 1.10E-14  | BGC0000679            | diazepinomicin (Terpene) | <i>Micromonospora</i> sp.                                       |
| WP_095729888 |                      | 556         | PudE (ABC-type siderophore export system)                          | transport                                                                      | WP_010846011          | cyclic peptide export ABC transporter       | 41.0 | 98.0       | 396.0        | 9.20E-110 | BGC0001716            | odilorhabdins (NRP)      | <i>Xenorhabdus nematophila</i>                                  |
| WP_095729887 |                      | 3188        | PPK12467; PRK05691 (NRPS)                                          | C-A-T-C-A-T-C-A-T                                                              | AXN93590              | non-ribosomal peptide synthetase PuwF-G     | 37.0 | 101.3      | 1953.0       | 0         | BGC0001951            | puwainaphycin F (NRP)    | <i>Cylindrospermum alatosporum</i>                              |
| WP_095729886 |                      | 4597        | PRK12316; PRK12467 (NRPS)                                          | C-A-T-C-A-T-C-A-T-C-A-T-TE                                                     | ABI26078              | nonribosomal peptide synthetase OciB        | 39.0 | 91.6       | 2889.0       | 0         | BGC0000331            | cyanopeptin (NRP)        | <i>Planktothrix agardhii</i>                                    |
| WP_095729885 |                      | 135         | DAGK IM like superfamily (Integral membrane diacylglycerol kinase) | ATP-dependent phosphorylation                                                  | BAG50454              | diacylglycerol kinase                       | 50.0 | 84.4       | 103.0        | 2.30E-22  | BGC0000780            | O&K-antigen (Saccharide) | <i>Vibrio parahaemolyticus</i>                                  |
| WP_095729884 |                      | 264         | PAP2 like                                                          | phosphatase/oxidase                                                            | WP_071564087*         | phosphatase PAP2 family protein             | 48.0 | 66.0       | 243.0        | 2e-76     | NA                    | NA                       | <i>Bathymodiolus thermophilus thioautotrophic gill symbiont</i> |
| WP_095729883 |                      | 542         | PRK11598                                                           | hydrolase                                                                      | NQY65624*             | phosphoethanolamine-lipid A transferase     | 51.0 | 68.0       | 591.0        | 0         | NA                    | NA                       | <i>Alteromonadaceae bacterium</i>                               |
| WP_095729882 |                      | 1231        | PAS 4; PRK11107 (sensory histidine kinase)                         | signal transduction                                                            | WP_091320338          | HAMP domain-containing protein              | 29.0 | 39.1       | 187.0        | 1.40E-46  | BGC0002007            | atolypene A (Terpene)    | <i>Amycolatopsis tolypomycina</i>                               |
| WP_095729881 |                      | 300         | PleD                                                               | response regulator                                                             | ACV42481              | putative adenylate/guanylate cyclase        | 27.0 | 62.0       | 76.0         | 8.70E-14  | BGC0000043            | curacin A (PK)           | <i>Moorea producens</i>                                         |
| WP_095729880 |                      | 129         | NA                                                                 | unknown                                                                        | KID36715*             | hypothetical protein                        | 93.0 | 94.0       | 240.0        | 9.00E-80  | NA                    | NA                       | <i>Pseudoalteromonas elyakovii</i>                              |
| WP_095729879 |                      | 126         | DUF3192                                                            | unknown                                                                        | WP_138582242*         | DUF3192 domain-containing protein           | 98.0 | 99.0       | 259.0        | 2e-87     | NA                    | NA                       | <i>Pseudoalteromonas</i> sp.                                    |
| WP_095729878 |                      | 315         | NADB Rossmann; 2-Hacid dh 4                                        | dehydrogenase                                                                  | BAK64657              | putative dehydrogenase                      | 31.0 | 95.9       | 104.0        | 2.40E-22  | BGC0000135            | reveromycin A (PK)       | <i>Streptomyces</i> sp.                                         |

Gene clusters were mined with antiSMASH 5.1 then individual encoded enzymes were compared to those in the Conserved Domain database (NCBI) and MiBiG repository. \*If a MiBiG homologue could not be detected, the closest BLASTp match from Genbank (NCBI) was recorded instead.

**Table S6. Novel NRPS-PKS 1 biosynthetic gene cluster (scaffold NZ\_NSDG01000004)**

| Protein Name | Protein ID (GenBank) | Length (aa) | Conserved domains (CD-Search)                            | Proposed function         | MiBiG Protein Homolog | MiBiG Homolog Description                         | % ID  | % Coverage | BLASTp Score | E-value  | MiBiG Homolog Cluster | MiBiG Cluster Product      | MiBiG Organism                        |
|--------------|----------------------|-------------|----------------------------------------------------------|---------------------------|-----------------------|---------------------------------------------------|-------|------------|--------------|----------|-----------------------|----------------------------|---------------------------------------|
| WP_095726664 |                      | 564         | G glu transpept (gamma-glutamyltranspeptidase)           | gamma-glutamyltransferase | AOC89013              | putative gamma-glutamyltransferase-like hydrolase | 31.0  | 104.3      | 267.0        | 3.83-71  | BGC0001652            | limazepine C (NRP)         | <i>Streptomyces</i> sp.               |
| WP_095726665 |                      | 671         | metallo-dependent hydrolase (amidohydrolase) superfamily | amidohydrolase            | TXD00011              | amidohydrolase family protein                     | 25.0  | 67.7       | 98.0         | 3.70E-20 | BGC0001877            | cyphomycin (PK)            | <i>Streptomyces</i> sp.               |
| WP_095726666 |                      | 3308        | FAAL; PP-; cond enzymes; HemL; PPK12467; AFD classI      | AL-T-KS-AT-T-AmT-C-A-T    | CAD17792              | NRPS-PKS                                          | 33.0  | 114.6      | 1668.0       | 0        | BGC0001754            | ralsolamycin (NRP/PK)      | <i>Ralstonia solanacearum</i>         |
| WP_095726667 |                      | 3275        | TubC; PRK12316; PRK12467                                 | C-A-T-C-A-T-C-A-T         | AAF17280              | NRPS (NosC)                                       | 32.0  | 103.5      | 1488.0       | 0        | BGC0001028            | nostopeptolide A2 (NRP/PK) | <i>Nostoc</i> sp.                     |
| WP_095726668 |                      | 4020        | PPK12467                                                 | C-A-T-C-A-T-E-C-A-TE      | AEU11003              | NRPS (NpnC)                                       | 32.0  | 100.9      | 1798.0       | 0        | BGC0001029            | nostophycin (NRP/PK)       | <i>Nostoc</i> sp.                     |
| WP_095726669 |                      | 322         | TauD; CAS like superfamily                               | hydroxylase               | AVI26391              | putative dioxygenase (TnaD)                       | 47.0  | 89.1       | 285.0        | 7.80E-77 | BGC0001800            | theonellamide (NRP/PK)     | <i>Candidatus Entotheonella sarta</i> |
| WP_095726670 |                      | 458         | beta-lactamase; transpeptidase superfamily               | serine hydrolase          | WP_17417055 g*        | Serine hydrolase                                  | 951.0 | 99.0       | 99.0         | 0        | NA                    | NA                         | <i>Pseudoalteromonas</i> sp.          |
| WP_010607109 |                      | 186         | DUF697                                                   | unknown                   | AFL68049              | uncharacterized protein associated with GTPases   | 42.0  | 66.1       | 106.0        | 6.40E-23 | BGC0001524            | barnesin A (NRP/PK)        | <i>Sulfurospirillum barnesii</i>      |
| WP_017217212 |                      | 58          | NA                                                       | unknown                   | WP_17243988 g*        | hypothetical protein                              | 98.0  | 100.0      | 116.0        | 7.00E-33 | NA                    | NA                         | <i>Pseudoalteromonas</i> sp.          |
| WP_095726671 |                      | 553         | PudE (ABC-type siderophore export system)                | transport                 | AFL68050              | ABC transporter                                   | 37.0  | 93.5       | 358.0        | 2.80E-98 | BGC0001524            | barnesin A (NRP/PK)        | <i>Sulfurospirillum barnesii</i>      |
| WP_095726672 |                      | 360         | SPFH prohibitin                                          | chaperone                 | AFL68051              | membrane protease subunit, stomatin/prohibitin    | 41.0  | 76.7       | 189.0        | 1.10E-47 | BGC0001524            | barnesin A (NRP/PK)        | <i>Sulfurospirillum barnesii</i>      |

Gene clusters were mined with antiSMASH 5.1 then individual encoded enzymes were compared to those in the Conserved Domain database (NCBI) and MiBiG repository. \*If a MiBiG homologue could not be detected, the closest BLASTp match from Genbank (NCBI) was recorded instead.



**Table S7. Novel Lanthipeptide-NRPS biosynthetic gene cluster (scaffold NZ\_NSDG01000099)**

| Protein Name | Protein ID (GenBank) | Length (aa) | Conserved domains (CD-Search)                                                              | Proposed function                 | MIBiG Protein Homolog | MIBiG Homolog Description                                  | % ID | % Coverage | BLASTp Score | E-value   | MIBiG Homolog Cluster | MIBiG Cluster Product                                           | MIBiG Organism                        |
|--------------|----------------------|-------------|--------------------------------------------------------------------------------------------|-----------------------------------|-----------------------|------------------------------------------------------------|------|------------|--------------|-----------|-----------------------|-----------------------------------------------------------------|---------------------------------------|
| WP_095729408 |                      | 807         | penicillin amidase superfamily                                                             | amidase/acylase                   | ADQ55483              | penicillin acylase                                         | 24.0 | 95.0       | 205.0        | 2.60E-52  | BGC0000350            | ET-743 (NRP/Beta-lactam)                                        | uncultured organism                   |
| WP_095729409 |                      | 1923        | PPK12467                                                                                   | C-A-T-C-A-T                       | AAO23333              | nonribosomal peptide synthetase NcpA                       | 29.0 | 94.6       | 752.0        | 2.30E-216 | BGC0000397            | nostocyclopeptide A2 (NRP)                                      | <i>Nostoc</i> sp.                     |
| WP_095729410 |                      | 1125        | TubC N; PRK12467                                                                           | C-A-T                             | AAO23333              | nonribosomal peptide synthetase NcpA                       | 38.0 | 98.1       | 718.0        | 1.30E-206 | BGC0000397            | nostocyclopeptide A2 (NRP)                                      | <i>Nostoc</i> sp.                     |
| WP_095729411 |                      | 2432        | TubC N; PRK12467                                                                           | C-A-T-C-A-T-TE                    | WP_06411855_9         | nonribosomal peptide synthetase                            | 33.0 | 100.0      | 1141.0       | 0         | BGC0001509            | anikasin (NRP)                                                  | <i>Pseudomonas fluorescens</i>        |
| WP_095729412 |                      | 336         | CAS like superfamily                                                                       | hydroxylase                       | ABL74947              | SyrP-like regulatory protein/ Dioxygenase                  | 41.0 | 92.0       | 274.0        | 3.20E-73  | BGC0001048            | tallysomylin A (NRP/Glycopeptide/PK)                            | <i>Streptoalloteichus hindustanus</i> |
| WP_095729413 |                      | 539         | PRK10522 (multidrug transporter membrane component/ATP-binding component)                  | transport                         | WP_01084601_1         | cyclic peptide export ABC transporter                      | 35.0 | 97.6       | 314.0        | 3.40E-85  | BGC0001716            | odilorhabdins (NRP)                                             | <i>Xenorhabdus nematophila</i>        |
| WP_095729414 |                      | 69          | NA                                                                                         | unknown                           | WP_13012721_6*        | hypothetical protein                                       | 88.0 | 92.0       | 105.0        | 3.00E-28  | NA                    | NA                                                              | <i>Pseudoalteromonas</i> sp.          |
| WP_095729415 |                      | 452         | glmU (UDP-N-acetylglucosamine diphosphorylase/glucosamine-1-phosphate N-acetyltransferase) | unknown                           | AAD13560              | dTDP-1-glucose synthase                                    | 36.0 | 25.0       | 72.0         | 1.90E-12  | BGC0000239            | landomycin A (Polyketide:Type II + Saccharide:Hybrid/tailoring) | <i>Pseudoalteromonas piscicida</i>    |
| WP_095729416 |                      | 414         | type I hlyD (secretion membrane fusion protein)                                            | transport                         | WP_04118287_3         | HlyD family efflux transporter periplasmic adaptor subunit | 25.0 | 92.8       | 117.0        | 6.20E-26  | BGC0002005            | RaxX (RiPP)                                                     | <i>Xanthomonas oryzae</i>             |
|              | None                 | 708         | SunT superfamily (bacteriocin/lantibiotic exporters)                                       | transport                         | AAI08400              | ABC transporter protein MceG                               | 40.0 | 93.0       | 425.0        | 2.10E-118 | BGC0000586            | microcin E492 (RiPP)                                            | <i>Klebsiella pneumoniae</i>          |
| WP_095729417 |                      | 396         | NA                                                                                         | unknown                           | WP_13852455_1*        | hypothetical protein                                       | 91.0 | 94.0       | 761.0        | 0         | NA                    | NA                                                              | <i>Pseudoalteromonas</i> sp.          |
| WP_095729418 |                      | 355         | LytS (sensor histidine kinase)                                                             | signalling                        | WP_08853218_8*        | histidine kinase                                           | 88.0 | 93.0       | 632.0        | 0         | NA                    | NA                                                              | <i>Pseudoalteromonas piscicida</i>    |
| WP_095729419 |                      | 262         | LytT (DNA-binding response regulator)                                                      | regulation                        | CBD77761              | regulatory protein                                         | 26.0 | 92.7       | 81.0         | 2.40E-15  | BGC0000974            | crocacin (NRP/PK)                                               | <i>Chondromyces crocatus</i>          |
| WP_095729420 |                      | 194         | NA                                                                                         | unknown                           | WP_13852454_7*        | hypothetical protein                                       | 95.0 | 98.0       | 368.0        | 3.00E-128 | NA                    | NA                                                              | <i>Pseudoalteromonas</i> sp.          |
| WP_095729421 |                      | 231         | P-loop NTPase superfamily (nucleoside triphosphate hydrolases)                             | transport                         | AKP45406              | ABC transporter ATP-binding protein                        | 44.0 | 97.4       | 204.0        | 1.60E-52  | BGC0001413            | cystobactamide (NRP)                                            | <i>Cystobacter</i> sp.                |
| WP_095729422 |                      | 405         | LoIE superfamily (ABC-type permease)                                                       | transport                         | AKP45404              | efflux ABC transporter                                     | 24.0 | 74.8       | 72.0         | 2.20E-12  | BGC0001413            | cystobactamide (NRP)                                            | <i>Cystobacter</i> sp.                |
| WP_095729423 |                      | 253         | LoIA superfamily (outer membrane lipoprotein-sorting protein)                              | transport                         | WP_12872720_7*        | outer membrane lipoprotein-sorting protein                 | 94.0 | 97.0       | 479.0        | 3.00E-170 | NA                    | NA                                                              | <i>Pseudoalteromonas</i> sp.          |
| WP_039493184 |                      | 66          | NA                                                                                         | Lanthipeptide leader/core peptide | WP_08853218_0*        | hypothetical protein                                       | 98.0 | 100.0      | 140.0        | 4.00E-42  | NA                    | NA                                                              | <i>Pseudoalteromonas piscicida</i>    |

|              |      |                              |                         |          |                                       |      |       |       |          |            |                                   |                                                   |
|--------------|------|------------------------------|-------------------------|----------|---------------------------------------|------|-------|-------|----------|------------|-----------------------------------|---------------------------------------------------|
| WP_095729424 | 401  | LanC superfamily (cyclase)   | lanthionine synthase    | AEK64493 | EtnC                                  | 25.0 | 91.5  | 86.0  | 8.60E-17 | BGC0000506 | entianin (RiPP/Lanthipeptide)     | <i>Bacillus subtilis</i> subsp. <i>spizizenii</i> |
| WP_095729425 | 1042 | Lant dehydr N; Lant dehydr C | lantibiotic dehydratase | AHF21234 | lanthionine biosynthesis protein PabB | 23.0 | 104.3 | 230.0 | 1.60E-59 | BGC0000542 | paenicidin B (RiPP/Lanthipeptide) | <i>Paenibacillus terrae</i>                       |

Gene clusters were mined with antiSMASH 5.1 then individual encoded enzymes were compared to those in the Conserved Domain database (NCBI) and MIBiG repository. \*If a MIBiG homologue could not be detected, the closest BLASTp match from Genbank (NCBI) was recorded instead.

**Table S8.** Predicted products of orphan NRPS/PKS biosynthesis gene clusters in HM-SA03

| Cluster | Size (kbp) | Type                                               | Predicted structure*                                                                                                                                                                                                   |
|---------|------------|----------------------------------------------------|------------------------------------------------------------------------------------------------------------------------------------------------------------------------------------------------------------------------|
| HYBR1   | 31.8       | Hybrid NRPS-PKS<br>(lipopeptide)                   | 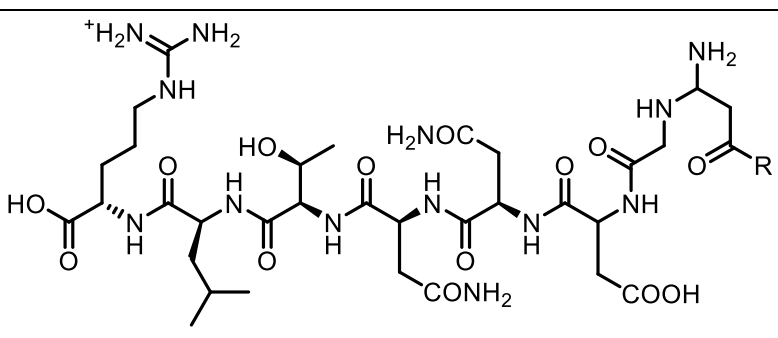                                                                                                                                     |
| HYBR2   | 16.4       | Hybrid<br>Lanthipeptide-<br>NRPS<br>(pentapeptide) |  <p>R: NH<sub>2</sub> or OH</p>                                                                                                     |
| NRPS2   | 23.4       | NRPS<br>(heptapeptide)                             |  <p>R<sub>1</sub>: OH or CH<sub>2</sub>NH<sub>2</sub><br/>R<sub>2</sub>: CH<sub>2</sub>NH<sub>2</sub> or NHC(NH)NH<sub>2</sub></p> |

\*Putative linear peptide is depicted
